# Supplementary material
Source: MDPI journal article supplement (https://www.mdpi.com/2076-0760/8/8/240)
Supplement: s1 [file s1]

**SECTION 1: Cause – Self-Schema Congruence** (from Chowdhury and Khare, 2011; Cronbach’s  $\alpha = 0.85$ ).

**Please circle the number that best describes your feelings regarding the social cause described in the advertisement, LGBT homeless youth**

How relevant is the sponsored cause to you?

Very Irrelevant   -3      -2      -1      0      1      2      3      Very Relevant

How congruent is the social cause to your personal values?

Very Incongruent   -3      -2      -1      0      1      2      3      Very Congruent

Overall, how good is the match between your personal values and the social cause?

Very Poor Match   -3      -2      -1      0      1      2      3      Very Good Match

**SECTION 2: Message Framing** (modified from Millar and Millar 2000 and Grau and Folse 2007)

**Please circle the number that best describes your perceptions about the text presented in the advertisement**

|                                                                                         | Strongly<br>v<br>Agree |   |   |   |   |   |   |  |  | Strongly<br>v<br>Disagree |
|-----------------------------------------------------------------------------------------|------------------------|---|---|---|---|---|---|--|--|---------------------------|
| 1. The wording in this cause-related marketing advertisement has a positive connotation | 1                      | 2 | 3 | 4 | 5 | 6 | 7 |  |  |                           |

**SECTION 3: Emotional appeal** (from Chang 2011; Cronbach's  $\alpha = 0.93$ )

Please circle the number that best describes the degree you agree with the following statements about how you felt after viewing the cause-related marketing advertisement

|                                                       | Strongly disagree | 1 | 2 | 3 | 4 | 5 | 6 | Strongly agree |
|-------------------------------------------------------|-------------------|---|---|---|---|---|---|----------------|
| 1. I felt guilty after viewing the advertisement      |                   | 1 | 2 | 3 | 4 | 5 | 6 | 7              |
| 2. I felt responsible after viewing the advertisement |                   | 1 | 2 | 3 | 4 | 5 | 6 | 7              |
| 3. I felt happy after viewing the advertisement       |                   | 1 | 2 | 3 | 4 | 5 | 6 | 7              |
| 4. I felt anxious after viewing the advertisement     |                   | 1 | 2 | 3 | 4 | 5 | 6 | 7              |
| 5. I felt accountable after viewing the advertisement |                   | 1 | 2 | 3 | 4 | 5 | 6 | 7              |
| 6. I felt ashamed after viewing the advertisement     |                   | 1 | 2 | 3 | 4 | 5 | 6 | 7              |

**SECTION 4: Elaboration** (from Karson and Korgaonkar, 2001; Cronbach's  $\alpha = 0.92$ )

Please circle the number that best describes your degree of engagement with the advertisement's contents as you viewed the ad

While going through the ad, I was

|                           |    |    |    |   |   |   |   |                           |
|---------------------------|----|----|----|---|---|---|---|---------------------------|
| Very uninvolved           | -3 | -2 | -1 | 0 | 1 | 2 | 3 | Very involved             |
| Concentrating very little | -3 | -2 | -1 | 0 | 1 | 2 | 3 | Concentrating very hard   |
| Paying little attention   | -3 | -2 | -1 | 0 | 1 | 2 | 3 | Paying a lot of attention |

Please circle the number that best describes the degree to which you agree with the following statements about your consideration of the claims in the advertisement

|                                                           | Strongly disagree | 1 | 2 | 3 | 4 | 5 | 6 | Strongly agree |
|-----------------------------------------------------------|-------------------|---|---|---|---|---|---|----------------|
| 1. I carefully considered the claims in the advertisement |                   | 1 | 2 | 3 | 4 | 5 | 6 | 7              |

Please list all thoughts, ideas, and images that occurred to you while looking at the advertisement:

**SECTION 5: Maladaptive response** (Chang, 2011 from Basil et al. 2008 – Cronbach’s  $\alpha = 0.8$ )

Please circle the number that best describes the degree to which you agree with the following statements about how you felt after viewing the cause-related marketing advertisement

|                                                                       | Strongly disagree | 1 | 2 | 3 | 4 | 5 | 6 | Strongly agree |
|-----------------------------------------------------------------------|-------------------|---|---|---|---|---|---|----------------|
| 1. I think ads like these are just a hoax to make the company rich    |                   | 1 | 2 | 3 | 4 | 5 | 6 | 7              |
| 2. I think this promotion is a scam                                   |                   | 1 | 2 | 3 | 4 | 5 | 6 | 7              |
| 3. Seeing this ad makes me less likely to purchase products like this |                   | 1 | 2 | 3 | 4 | 5 | 6 | 7              |

**SECTION 6: Attitude toward the brand** (Chang 2011, Cronbach’s  $\alpha = 0.88$ )

Please circle the number which best reflects your attitude toward the brand, Complement

I believe the brand portrayed in the ad, Complement, is

|             |    |    |    |   |   |   |   |           |
|-------------|----|----|----|---|---|---|---|-----------|
| Bad         | -3 | -2 | -1 | 0 | 1 | 2 | 3 | Good      |
| Negative    | -3 | -2 | -1 | 0 | 1 | 2 | 3 | Positive  |
| Unfavorable | -3 | -2 | -1 | 0 | 1 | 2 | 3 | Favorable |

**SECTION 7: Attitude toward the cause** (Lafferty and Goldsmith 2005)

**Please circle the number which best reflects your attitude toward the social cause, LGBT homeless youth**

I believe the cause (LGBT homeless youth) portrayed in the ad, is

|             |    |    |    |   |   |   |   |           |
|-------------|----|----|----|---|---|---|---|-----------|
| Bad         | -3 | -2 | -1 | 0 | 1 | 2 | 3 | Good      |
| Negative    | -3 | -2 | -1 | 0 | 1 | 2 | 3 | Positive  |
| Unfavorable | -3 | -2 | -1 | 0 | 1 | 2 | 3 | Favorable |

**SECTION 8: Purchase intention** (Chang 2011 and Grau and Folse 2007, Cronbach's a = 0.83)

**Please circle the number that best describes the degree to which you agree with the following statements about how you felt after viewing the cause-related marketing advertisement**

|                                                                                                | Strongly disagree | 1 | 2 | 3 | 4 | 5 | 6 | 7 | Strongly agree |
|------------------------------------------------------------------------------------------------|-------------------|---|---|---|---|---|---|---|----------------|
| 1. I would be willing to participate in the cause-related marketing campaign                   |                   | 1 | 2 | 3 | 4 | 5 | 6 | 7 |                |
| 2. I would consider purchasing this product in order to provide help to the cause              |                   | 1 | 2 | 3 | 4 | 5 | 6 | 7 |                |
| 3. It is likely that I would contribute to this cause by getting involved in this CRM campaign |                   | 1 | 2 | 3 | 4 | 5 | 6 | 7 |                |

**SECTION 8: Demographic information**

What is your age? \_\_\_\_\_

What is your gender? \_\_\_\_\_

Are you a Hispanic or Latino/Latina? Yes [ ] No [ ]

If not, what ethnic group do you consider [ ] Asian American

yourself to be a member of? [ ] Black or African American

[ ] Hispanic or Latino

- Native American
- Native Hawaiian or Pacific Islander
- White or European
- Mixed/Bi-racial
- Other? (please specify) \_\_\_\_\_

Please indicate total household income

- Below \$15,000 \_\_\_\_\_
- \$15,000 - \$24,999 \_\_\_\_\_
- \$25,000 - \$34,999 \_\_\_\_\_
- \$35,000 - \$49,999 \_\_\_\_\_
- \$ 50,000 - \$74,999 \_\_\_\_\_
- \$ 75,000 - \$99,999 \_\_\_\_\_
- Above \$100,000

Year in school:

- Freshman
- Sophomore
- Junior
- Senior
- Master's student
- Ph.D. student

What is your major

\_\_\_\_\_

Do you identify as a member of the LGBT community? \_\_\_\_\_
